# Supplementary material for: Effects of Wheat Bran Micronization on the Quality of Reconstituted Whole-Wheat Flour and Its Cooked Noodles
Source: MDPI journal article supplement (doi:10.3390/pr10051001), 2022-05-18
Supplement: s1 [file s1]

Archive with 1 entries (1 files):
- processes-1716184-supplementary.pdf
