# Supplementary material for: Effects of Wheat Bran Micronization on the Quality of Reconstituted Whole-Wheat Flour and Its Cooked Noodles
Source: MDPI journal article supplement (doi:10.3390/pr10051001), 2022-05-18
Supplement: s1 [file s1 › processes-1716184-supplementary.pdf]

**Table S1.** The sensory evaluation details of cooked whole wheat noodles.

| Parameters  | Full score | Criterion                                                                                                                                                                           |
|-------------|------------|-------------------------------------------------------------------------------------------------------------------------------------------------------------------------------------|
| Firmness    | 20         | Firmness when bitten. Appropriate for 17-20; Slightly soft or hard for 12-17; Too soft or hard for 1-12.                                                                            |
| Elasticity  | 25         | Elastic and cohesive when chewed. Good for 21-25; General for 15-21; Poor for 1-15.                                                                                                 |
| Smoothness  | 10         | Smooth feeling when tasted. Smooth for 8.5-10; General for 6-8.5; Rough for 1-6.                                                                                                    |
| Taste       | 15         | Flavor when tasted. Own wheat flavor for 12-15; without undesirable for 9-12; with undesirable for 1-9;                                                                             |
| Appearance  | 10         | Smoothness and transparency of surface. Smooth and significant transparent for 8.5-10; slightly smooth and unobvious transparent for 6-8.5; rough and significant inflated for 1-6; |
| Color       | 20         | Brightness under natural light. Bright white or yellow for 17-20; General or slight dark for 12-17; gloomy for 1-12.                                                                |
| Total score | 100        |                                                                                                                                                                                     |
